# Supplementary material
Source: publisher figshare collection journal article supplement (https://tandf.figshare.com/ndownloader/files/23614364)
Supplement: Supplementary file 1 [file 23614364]

**Supplementary Table 1:** Sequential extraction technique for determination of micronutrients fractions

| Exchangeable + Water soluble | Shuman (1985) |
| --- | --- |
| Carbonates | Tessier, Campbell, and Bission (1979) |
| Organically bound | Shuman (1983) |
| Mn-Oxides bound | Chao (1972) |
| Amorphous Iron Oxide bound | Chao and Zhou (1983) |
| Crystalline Iron Oxide bound | Shuman (1982) |
